# Supplementary material for: Highly-accurate metabolomic detection of early-stage ovarian cancer
Source: PubMed Central journal article supplement (PMC4647115; doi:10.1038/srep16351), 2015-11-17
Supplement: srep16351-s1.pdf [file srep16351-s1.pdf]

# Highly-accurate metabolomic detection of early-stage ovarian cancer

David A. Gaul<sup>1,2</sup>, Roman Mezencev<sup>2</sup>, Tran Q. Long<sup>3</sup>, Christina M. Jones<sup>1</sup>, Benedict B. Benigno<sup>4</sup>, Alexander Gray<sup>3</sup>, Facundo M. Fernández<sup>1,5,\*</sup>, John F. McDonald<sup>2,4,5\*</sup>

<sup>1</sup>School of Chemistry and Biochemistry, Georgia Institute of Technology, Atlanta GA 30332 (USA).

<sup>2</sup>School of Biology, Integrated Cancer Research Center, Georgia Institute of Technology, Atlanta GA 30332 (USA).

<sup>3</sup>College of Computing, Georgia Institute of Technology, Atlanta GA 30332 (USA).

<sup>4</sup>Ovarian Cancer Institute, Atlanta GA 30342 (USA).

<sup>5</sup>Parker H. Petit Institute of Bioengineering and Biosciences, Georgia Institute of Technology, Atlanta GA 30332 (USA).

Correspondence should be addressed to J.F.M. ([john.mcdonald@biology.gatech.edu](mailto:john.mcdonald@biology.gatech.edu))

\*Equally contributing authors

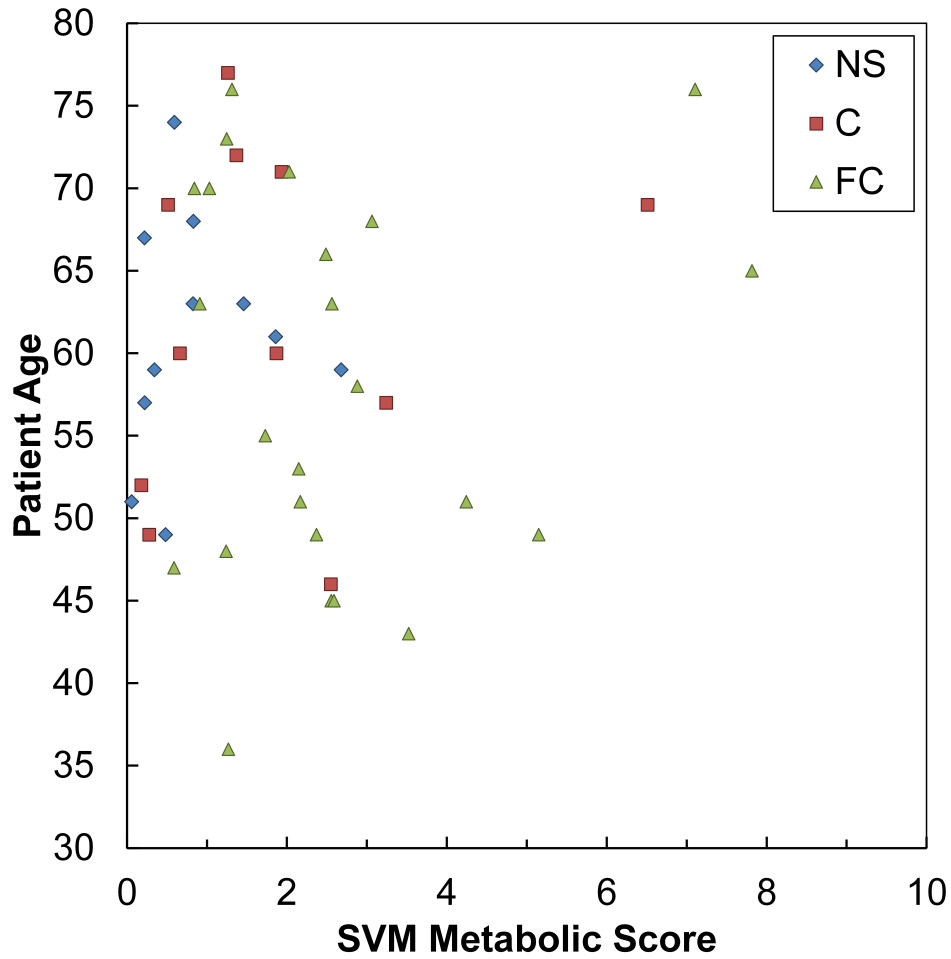

**Fig. S1. SVM scores plotted as a function of patient age for each of three patient collection sites.**

The results demonstrate no clustering of patients based on collection site (NS = Northside Hospital, Atlanta, GA, USA; C = Alberta Health Services, Alberta, Canada; FC = Fox Chase Cancer Center Biosample Repository Facility, Philadelphia, PA, USA).

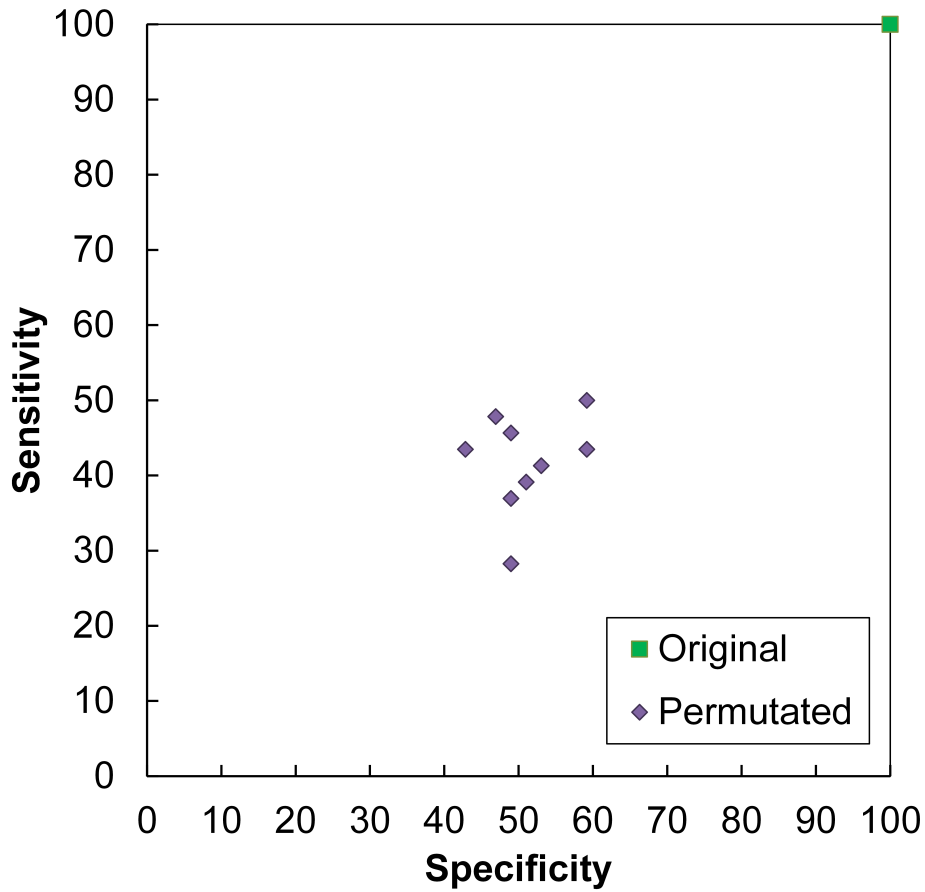

**Fig. S2. Permutation test (n=10) for SVM model built incorporating 16 selected features.** The class labels were randomized prior to building the SVM models. Plot of sensitivity versus specificity illustrates the class label dependence. The significant separation between the original and permutated data points indicates that the original model was not over fit.

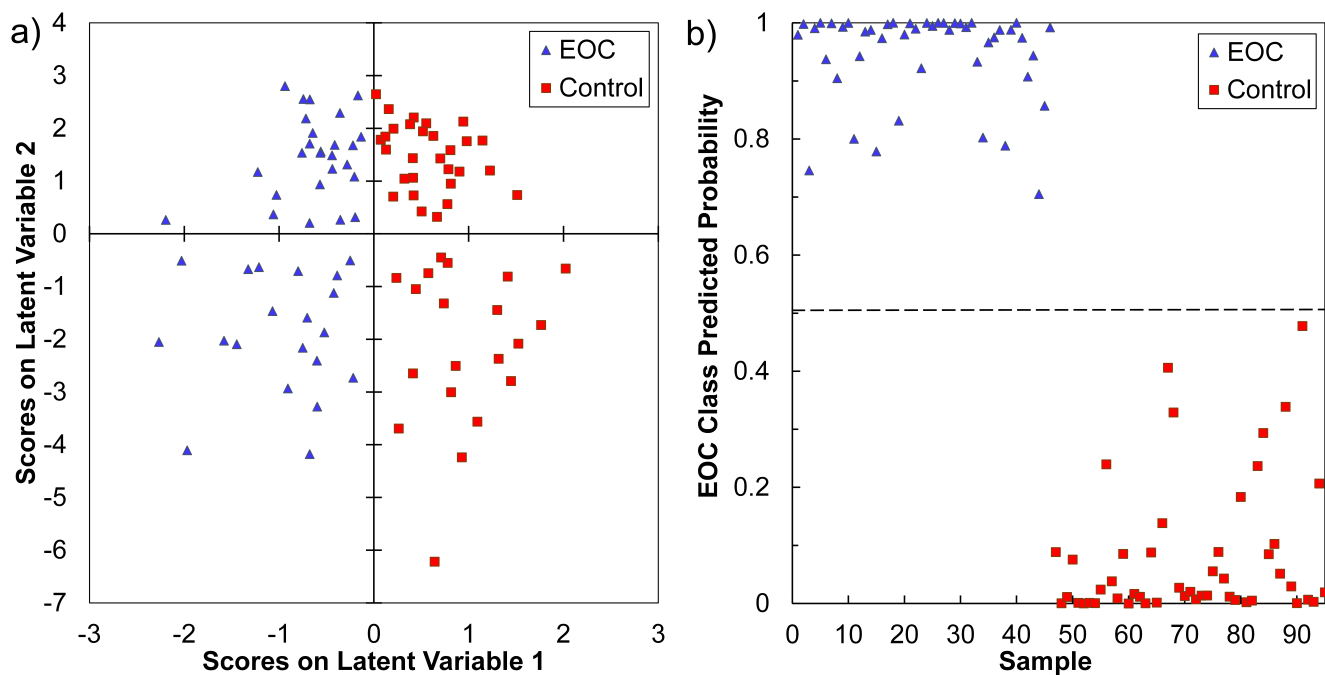

**Fig. S3. oPLS-DA model built using the selected 16 features identified from SVM-RFE.** oPLS-DA models were internally evaluated by leave-one-out cross validation (LOOCV). Five latent variables were found to capture 54.4% of the X-block variance (feature peak areas) and 34.9% of the Y-block variance from the (class membership). The LOOCV validated accuracy, sensitivity, and specificity were 96.8%, 95.7%, and 98.0%, respectively. a) Score plot of first and second latent variables from the oPLS-DA model built with LOOCV illustrating sample separation into EOC (triangles) and control (square) classes. b) The predicted probability of EOC class membership, where 1 is most probable and 0 is least likely.

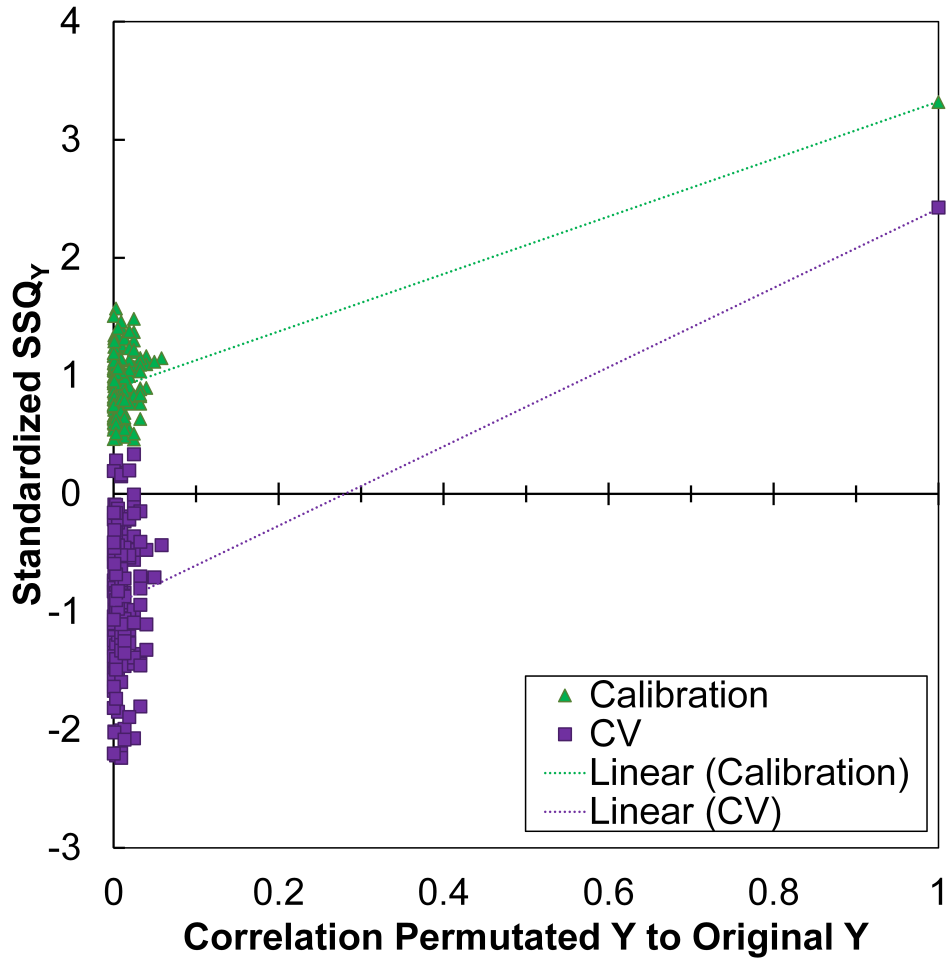

**Fig. S4. Y-block permutation results for 200 iterations for both self-predicted (calibration, C) and cross-validated (CV) values.** Standardized sum squared Y ( $SSQ_Y$ ) was plotted versus correlation of permuted results to un-permuted results. The original un-permuted results are shown on the right side of the figure. The significant separation between permuted (left side) and un-permuted (right side) results along with higher y values for the permuted versus the un-permuted results support that the original model is more likely significant, and not over fit.

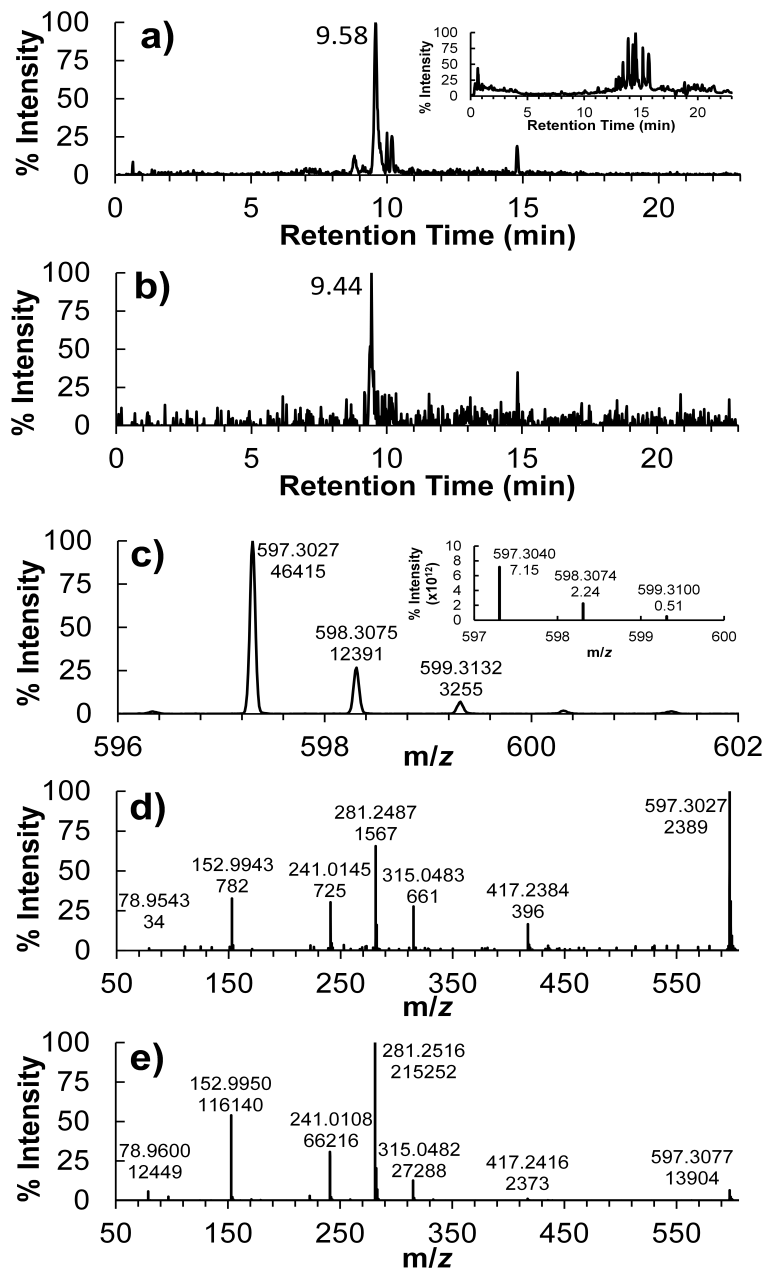

**Fig. S5. Identification of metabolite #286 as lysophosphospatidylinositol (18:1).** (a) Extracted ion chromatogram of  $m/z$  597.3029 from a pooled serum sample (inset spectrum is total ion chromatogram from a pooled serum sample); (b) extracted ion chromatogram of  $m/z$  597.3029 from a standard; (c) experimental isotopic pattern that agrees with theoretical isotopic pattern for  $C_{27}H_{51}O_{12}P$  (see inset spectrum, calculated using MassLynx V4.1); (d) MS/MS spectrum from a pooled serum sample collected using a collision energy (CE) of 30 eV; and (e) MS/MS spectrum (CE 30 eV) of direct injection of standard.

**Table S1. Histopathologies of patients analyzed in this study.** Listed are FIGO stage and grade (when available) for the cancer patients (normal samples also listed). NS = Northside Hospital Atlanta, GA, USA; C = Alberta Health Services, Alberta, Canada; FC = Fox Chase Cancer Center Biosample Repository Facility, Philadelphia, PA, USA. Average age of EOC patients at blood draw was 59.7 years old (median = 60 years) and the average age of control patients was 56.9 years old (median = 55). The difference in average ages was not significant by T test.

| <b>Patient ID</b> | <b>Ovarian Histopathology</b> | <b>FIGO Stage / grade</b> | <b>Age at Blood Draw</b> | <b>Source</b> |
|-------------------|-------------------------------|---------------------------|--------------------------|---------------|
| 1117              | Papillary serous carcinoma    | 2B / 3                    | 68                       | NS            |
| 1105              | Papillary serous carcinoma    | 1C / 1                    | 67                       | NS            |
| 989               | Papillary serous carcinoma    | 1B / 3                    | 51                       | NS            |
| 876               | Papillary serous carcinoma    | 2A / 1                    | 63                       | NS            |
| 550               | Papillary serous carcinoma    | 2A / 2                    | 49                       | NS            |
| 517               | Papillary serous carcinoma    | 1A / 3                    | 59                       | NS            |
| 491               | Papillary serous carcinoma    | 1 / unk                   | 74                       | NS            |
| 336               | Papillary serous carcinoma    | 1C / 3                    | 63                       | NS            |
| 317               | Papillary serous carcinoma    | 1C / 3                    | 59                       | NS            |
| 170               | Papillary serous carcinoma    | 2A / 2                    | 57                       | NS            |
| 2                 | Papillary serous carcinoma    | 2B / 3                    | 61                       | NS            |
| RT42              | Papillary serous carcinoma    | 1C / unk                  | 69                       | C             |
| F5223             | Papillary serous carcinoma    | 2C / 3                    | 52                       | C             |
| RT68              | Papillary serous carcinoma    | 2C / 3                    | 46                       | C             |
| RT332             | Papillary serous carcinoma    | 1A / 1                    | 49                       | C             |
| NEO1              | Papillary serous carcinoma    | 1C / unk                  | 71                       | C             |
| RT514             | Papillary serous carcinoma    | 1C / 3                    | 57                       | C             |
| RT965             | Papillary serous carcinoma    | 2A / unk                  | 60                       | C             |
| RT523             | Papillary serous carcinoma    | 1C / 3                    | 77                       | C             |
| RT261             | Papillary serous carcinoma    | 2A / 3                    | 72                       | C             |
| RT36              | Papillary serous carcinoma    | 1B / 3                    | 69                       | C             |
| RT01              | Papillary serous carcinoma    | 2C / 3                    | 60                       | C             |
| 106220            | Papillary serous carcinoma    | 1C / 3                    | 58                       | FC            |
| 108403            | Papillary serous carcinoma    | 2C / unk                  | 76                       | FC            |
| 111079            | Papillary serous carcinoma    | 1A / 1                    | 47                       | FC            |
| 113885            | Papillary serous carcinoma    | 2C / 2                    | 53                       | FC            |
| 115403            | Papillary serous carcinoma    | 2C / 3                    | 55                       | FC            |
| 116804            | Papillary serous carcinoma    | 1C / 2                    | 68                       | FC            |
| 118020            | Papillary serous carcinoma    | 2A / 3                    | 51                       | FC            |
| 119189            | Papillary serous carcinoma    | 2C / 3                    | 51                       | FC            |
| 119652            | Papillary serous carcinoma    | 1A / 2                    | 43                       | FC            |
| 120136            | Papillary serous carcinoma    | 1A / 1                    | 49                       | FC            |
| 122955            | Papillary serous carcinoma    | 2C / 3                    | 45                       | FC            |
| 123534            | Papillary serous carcinoma    | 2C / 3                    | 66                       | FC            |
| 124093            | Papillary serous carcinoma    | 2B / 3                    | 63                       | FC            |

| <b>Patient ID</b> | <b>Ovarian Histopathology</b> | <b>FIGO Stage / grade</b> | <b>Age at Blood Draw</b> | <b>Source</b> |
|-------------------|-------------------------------|---------------------------|--------------------------|---------------|
| 125989            | Papillary serous carcinoma    | 1C / 3                    | 49                       | FC            |
| 126530            | Papillary serous carcinoma    | 2B / 3                    | 70                       | FC            |
| 127366            | Papillary serous carcinoma    | 2C / 3                    | 70                       | FC            |
| 127305            | Papillary serous carcinoma    | 2B / 3                    | 71                       | FC            |
| 131043            | Papillary serous carcinoma    | 1A / 3                    | 76                       | FC            |
| 128426            | Papillary serous carcinoma    | 2B / unk                  | 36                       | FC            |
| 129614            | Papillary serous carcinoma    | 1C / unk                  | 45                       | FC            |
| 130196            | Papillary serous carcinoma    | 2B / 3                    | 65                       | FC            |
| 131589            | Papillary serous carcinoma    | 2C / 3                    | 48                       | FC            |
| 133011            | Papillary serous carcinoma    | 2C / 3                    | 63                       | FC            |
| 135520            | Papillary serous carcinoma    | 2C / 3                    | 73                       | FC            |

| <b>Patient ID</b> | <b>Age at Blood Draw</b> | <b>Source</b> |
|-------------------|--------------------------|---------------|
| 1094              | 50                       | NS            |
| 1080              | 49                       | NS            |
| 1064              | 63                       | NS            |
| 1051              | 45                       | NS            |
| 917               | 49                       | NS            |
| 908               | 78                       | NS            |
| 875               | 47                       | NS            |
| 783               | 52                       | NS            |
| 757               | 84                       | NS            |
| 755               | 75                       | NS            |
| 751               | 60                       | NS            |
| 691               | 70                       | NS            |
| 682               | 53                       | NS            |
| 677               | 68                       | NS            |
| 665               | 84                       | NS            |
| 645               | 61                       | NS            |
| 636               | 71                       | NS            |
| 627               | 59                       | NS            |
| 615               | 42                       | NS            |
| 593               | 58                       | NS            |
| 592               | 48                       | NS            |
| 557               | 61                       | NS            |
| 544               | 49                       | NS            |
| 540               | 59                       | NS            |
| 534               | 72                       | NS            |
| 504               | 48                       | NS            |
| 494               | 51                       | NS            |



| <b>Patient ID</b> | <b>Age at Blood Draw</b> | <b>Source</b> |
|-------------------|--------------------------|---------------|
| 481               | 63                       | NS            |
| 479               | 55                       | NS            |
| 448               | 63                       | NS            |
| 440               | 50                       | NS            |
| 1043              | 52                       | NS            |
| 1046              | 49                       | NS            |
| 1022              | 58                       | NS            |
| 960               | 43                       | NS            |
| 899               | 45                       | NS            |
| 891               | 52                       | NS            |
| 873               | 62                       | NS            |
| 870               | 40                       | NS            |
| 849               | 64                       | NS            |
| 842               | 70                       | NS            |
| 838               | 79                       | NS            |
| 482               | 44                       | NS            |
| 719               | 55                       | NS            |
| 648               | 50                       | NS            |
| 572               | 40                       | NS            |
| 524               | 45                       | NS            |
| 522               | 61                       | NS            |
| 505               | 42                       | NS            |

**Table S2. List of 255 metabolic features ( $R_t$ ,  $m/z$  pairs) used to build a discriminant linear support vector machine (SVM) model to distinguish sera from epithelial ovarian cancer patients vs. normal controls.**

| <b>Feature</b> | <b><math>m/z</math>, <math>R_t</math></b> |
|----------------|-------------------------------------------|
| 342            | 125.0960, 1.81                            |
| 284            | 125.0963, 1.15                            |
| 620            | 129.0909, 1.14                            |
| 579            | 157.1222, 2.29                            |
| 140            | 171.1380, 3.49                            |
| 280            | 177.1267, 1.96                            |
| 12             | 187.0068, 0.69                            |
| 74             | 187.0962, 0.72                            |
| 378            | 187.0965, 0.99                            |
| 438            | 191.0685, 1.78                            |
| 105            | 195.1016, 1.01                            |
| 186            | 203.0821, 0.60                            |
| 490            | 209.0799, 1.69                            |
| 170            | 221.1265, 2.24                            |
| 403            | 223.1329, 1.23                            |
| 539            | 224.0589, 1.03                            |
| 41             | 224.0591, 0.84                            |
| 379            | 225.0630, 0.86                            |
| 43             | 225.1844, 11.68                           |
| 1229           | 226.1802, 6.92                            |
| 615            | 227.1161, 2.69                            |
| 631            | 229.1243, 1.62                            |
| 633            | 231.1115, 2.20                            |
| 59             | 238.0751, 0.93                            |
| 125            | 239.0879, 0.99                            |
| 271            | 241.0859, 1.59                            |
| 79             | 245.1378, 0.99                            |
| 243            | 251.2001, 12.66                           |
| 257            | 253.1349, 3.44                            |
| 6              | 253.2165, 13.35                           |
| 260            | 254.6201, 2.56                            |
| 174            | 254.6201, 2.55                            |
| 92             | 255.6277, 3.60                            |
| 410            | 259.1540, 1.30                            |

| <b>Feature</b> | <b>m/z, R<sub>t</sub></b> |
|----------------|---------------------------|
| 683            | 261.0727, 1.02            |
| 873            | 265.1466, 8.17            |
| 88             | 265.1469, 7.79            |
| 406            | 267.1231, 1.23            |
| 129            | 271.2271, 12.06           |
| 50             | 273.1678, 1.78            |
| 229            | 275.2002, 12.52           |
| 419            | 279.6111, 2.65            |
| 274            | 280.6188, 3.48            |
| 25             | 281.3435, 14.51           |
| 673            | 282.1439, 1.34            |
| 641            | 283.1511, 1.48            |
| 230            | 285.1231, 3.44            |
| 604            | 287.1854, 2.49            |
| 130            | 289.1625, 1.14            |
| 238            | 291.122, 3.43             |
| 264            | 291.1229, 1.62            |
| 987            | 294.6169, 6.45            |
| 1016           | 295.2259, 10.96           |
| 1648           | 297.1513, 8.52            |
| 319            | 301.2005, 3.53            |
| 84             | 301.2164, 13.13           |
| 639            | 302.1125, 1.62            |
| 285            | 302.1126, 3.46            |
| 8              | 303.2324, 13.76           |
| 35             | 305.2476, 14.28           |
| 14             | 307.2633, 14.80           |
| 16             | 309.2789, 15.31           |
| 1238           | 310.1561, 3.82            |
| 58             | 311.1392, 1.65            |
| 277            | 311.6628, 2.78            |
| 223            | 311.6629, 2.76            |
| 269            | 313.1038, 3.45            |
| 156            | 313.1181, 5.29            |
| 630            | 313.1184, 4.94            |
| 13             | 327.232, 13.71            |
| 581            | 328.1576, 7.52            |
| 571            | 329.1733, 4.81            |
| 15             | 329.2477, 14.13           |
| 107            | 331.1898, 4.89            |

| Feature | m/z, R <sub>t</sub> |
|---------|---------------------|
| 10      | 339.2303, 13.54     |
| 83      | 353.1615, 2.12      |
| 64      | 365.3413, 16.97     |
| 55      | 367.1573, 2.95      |
| 546     | 369.1727, 3.31      |
| 70      | 369.1731, 3.98      |
| 547     | 369.1732, 4.57      |
| 429     | 383.1525, 1.84      |
| 611     | 385.1671, 1.32      |
| 418     | 388.2509, 10.70     |
| 121     | 397.2038, 4.10      |
| 608     | 399.2179, 6.36      |
| 132     | 407.2192, 12.29     |
| 149     | 409.2347, 13.18     |
| 114     | 409.2348, 12.96     |
| 952     | 411.4854, 0.65      |
| 564     | 413.1989, 3.23      |
| 71      | 415.3568, 16.88     |
| 231     | 429.2997, 11.49     |
| 27      | 429.373, 17.38      |
| 131     | 433.2348, 12.56     |
| 100     | 433.2349, 12.75     |
| 202     | 435.2508, 13.52     |
| 1086    | 445.3309, 14.72     |
| 96      | 445.3313, 14.75     |
| 599     | 447.1329, 6.11      |
| 159     | 447.3469, 14.92     |
| 127     | 448.3058, 8.04      |
| 181     | 449.3618, 15.14     |
| 261     | 451.2275, 1.58      |
| 541     | 452.2772, 11.89     |
| 19      | 452.2776, 13.23     |
| 478     | 465.3544, 13.11     |
| 123     | 467.3727, 14.61     |
| 241     | 473.3621, 15.10     |
| 124     | 476.2769, 12.71     |
| 24      | 476.2777, 12.81     |
| 180     | 478.2931, 12.29     |
| 31      | 478.2934, 13.50     |
| 161     | 480.3084, 13.18     |

| Feature | m/z, R <sub>t</sub> |
|---------|---------------------|
| 138     | 480.3086, 13.05     |
| 32      | 480.3088, 14.23     |
| 128     | 487.2037, 0.69      |
| 401     | 498.2884, 7.37      |
| 535     | 498.9287, 7.46      |
| 569     | 498.9291, 6.99      |
| 29      | 500.2776, 12.81     |
| 62      | 501.3056, 10.35     |
| 295     | 501.3935, 15.57     |
| 351     | 503.4092, 15.94     |
| 204     | 504.3075, 12.64     |
| 148     | 504.308, 12.75      |
| 434     | 506.3255, 13.50     |
| 146     | 508.4724, 17.21     |
| 380     | 508.7409, 0.92      |
| 356     | 515.321, 10.84      |
| 340     | 522.4885, 17.88     |
| 28      | 524.2778, 12.79     |
| 110     | 526.2931, 13.16     |
| 66      | 529.3378, 11.18     |
| 196     | 529.4221, 13.37     |
| 310     | 531.1789, 13.00     |
| 144     | 534.4874, 17.52     |
| 45      | 536.5042, 18.56     |
| 473     | 537.2473, 3.45      |
| 957     | 537.414, 14.59      |
| 102     | 537.4151, 14.63     |
| 113     | 539.43, 14.73       |
| 226     | 539.4301, 14.86     |
| 888     | 540.4332, 14.61     |
| 279     | 552.2327, 0.70      |
| 282     | 555.4542, 16.20     |
| 155     | 557.4571, 17.34     |
| 56      | 557.4572, 16.79     |
| 875     | 558.4605, 16.80     |
| 360     | 561.487, 18.22      |
| 188     | 564.5352, 20.55     |
| 189     | 573.4520, 14.90     |
| 207     | 575.4655, 16.44     |
| 198     | 575.4663, 15.99     |

| <b>Feature</b> | <b>m/z, R<sub>t</sub></b> |
|----------------|---------------------------|
| 201            | 577.4813, 16.47           |
| 108            | 581.4537, 13.82           |
| 137            | 582.5082, 18.53           |
| 76             | 585.4853, 14.50           |
| 337            | 588.4387, 16.84           |
| 309            | 591.3911, 14.54           |
| 171            | 591.4614, 14.89           |
| 48             | 593.4776, 15.28           |
| 154            | 595.2876, 10.10           |
| 34             | 595.4929, 15.49           |
| 256            | 595.7483, 0.71            |
| 286            | 597.3029, 10.89           |
| 267            | 599.3189, 11.64           |
| 531            | 601.7721, 0.74            |
| 329            | 605.4535, 13.78           |
| 175            | 614.4536, 17.10           |
| 206            | 616.4699, 18.09           |
| 33             | 617.732, 0.65             |
| 82             | 619.2874, 10.13           |
| 90             | 620.5979, 18.20           |
| 668            | 627.3723, 7.62            |
| 157            | 634.6114, 21.26           |
| 364            | 642.4857, 18.36           |
| 1011           | 645.4488, 18.46           |
| 381            | 646.6128, 19.47           |
| 213            | 646.6128, 19.27           |
| 160            | 657.4957, 17.10           |
| 795            | 671.4638, 19.04           |
| 798            | 673.4798, 20.42           |
| 195            | 673.4802, 20.36           |
| 884            | 673.7984, 0.77            |
| 1030           | 685.5277, 18.36           |
| 450            | 688.4908, 18.53           |
| 512            | 695.4644, 18.83           |
| 37             | 696.7672, 0.67            |
| 93             | 698.5111, 19.98           |
| 789            | 698.5113, 20.14           |
| 63             | 698.5568, 17.85           |
| 355            | 699.4957, 21.18           |
| 461            | 700.5245, 21.60           |

| Feature | m/z, R <sub>t</sub> |
|---------|---------------------|
| 1270    | 714.5073, 19.07     |
| 78      | 716.522, 20.439     |
| 1542    | 720.4897, 18.71     |
| 22      | 722.5133, 19.74     |
| 251     | 723.4963, 20.93     |
| 217     | 724.5256, 20.72     |
| 91      | 724.527, 20.44      |
| 338     | 726.5389, 22.56     |
| 655     | 726.5422, 22.65     |
| 413     | 729.4412, 12.38     |
| 304     | 731.312, 0.69       |
| 583     | 736.5267, 21.06     |
| 344     | 736.5268, 20.86     |
| 232     | 736.5269, 20.94     |
| 388     | 738.507, 18.37      |
| 81      | 738.5073, 19.05     |
| 786     | 740.5231, 19.53     |
| 72      | 740.5232, 19.38     |
| 312     | 742.5382, 21.16     |
| 42      | 742.5386, 21.24     |
| 779     | 742.5397, 21.59     |
| 185     | 744.562, 17.85      |
| 135     | 746.5117, 19.07     |
| 776     | 746.5122, 19.57     |
| 21      | 746.5127, 19.54     |
| 350     | 747.5636, 18.10     |
| 18      | 748.5287, 20.25     |
| 199     | 750.5408, 20.57     |
| 1138    | 750.5433, 21.99     |
| 46      | 750.5438, 22.41     |
| 291     | 757.4730, 12.99     |
| 492     | 760.5257, 20.46     |
| 709     | 760.5299, 20.40     |
| 773     | 762.5069, 18.77     |
| 311     | 762.5071, 18.28     |
| 780     | 764.522, 19.37      |
| 307     | 764.5221, 19.83     |
| 39      | 764.5237, 19.28     |
| 20      | 766.5394, 21.07     |
| 339     | 768.5528, 22.29     |

| <b>Feature</b> | <b>m/z, R<sub>t</sub></b> |
|----------------|---------------------------|
| 69             | 772.5287, 20.02           |
| 785            | 772.5293, 20.07           |
| 415            | 772.5457, 13.17           |
| 858            | 774.5432, 20.88           |
| 73             | 774.5442, 22.12           |
| 192            | 774.5639, 13.45           |
| 796            | 788.5223, 19.12           |
| 783            | 790.5372, 21.11           |
| 57             | 790.5396, 20.88           |
| 470            | 804.5555, 18.66           |
| 54             | 833.5196, 15.26           |
| 67             | 835.5352, 15.56           |
| 47             | 857.5197, 15.25           |
| 122            | 859.5345, 15.41           |
| 193            | 860.6111, 17.58           |
| 2009           | 861.5512, 15.71           |
| 211            | 863.5657, 16.15           |
| 80             | 883.5358, 15.40           |
| 77             | 887.5679, 15.96           |
| 182            | 909.5515, 15.67           |



**Table S3. oPLS-DA models built with the SVM-RFE selected 16 features incorporating different cross validation (CV) techniques.** Due to limited sample size, data over-fitting is a valid concern. The multivariate SVM-RFA model was thus validated by comparing with oPLS-DA using several cross-validation (CV) approaches, as detailed in the table. Some CV approaches are more stringent than others, but all show consistently high accuracy (>90%). As a negative control, we used a permutation approach showing that when the labels for the samples are scrambled, there is NO classification (*i.e.* the accuracy drops to 50-60%, which is close to a random object draw). Overall, our results demonstrate that regardless of CV strategy employed we did not find any evidence of over-fitting of the selected metabolite abundances. Techniques include: leave-one-out, venetian blinds (10 data splits and 10 samples per blind), contiguous block (10 splits), and random subsets (10 data splits and 10 iterations). The root mean square error (RMSE) is a measure of performance of how close the data are to the model prediction. RMSE scale is 0 to  $\infty$ , with 0 being the best correlation. Similarity of RMSE for the calibration and CV suggests the model is not over fitting the data. For comparison, scores from the permuted set (class labels scrambled) are also included below to demonstrate the oPLS-DA model's dependence on the class labels.

|                                            | <b>Accuracy</b> | <b>Sensitivity</b> | <b>Specificity</b> | <b>RMSE EOC</b> | <b>RMSE Control</b> |
|--------------------------------------------|-----------------|--------------------|--------------------|-----------------|---------------------|
| oPLS-DA calibration                        | 1.000           | 1.000              | 1.000              | 0.557           | 0.584               |
| Leave-one-out CV                           | 0.968           | 0.957              | 0.980              | 0.599           | 0.628               |
| Venetian blinds CV                         | 0.915           | 0.891              | 0.939              | 0.622           | 0.627               |
| Contiguous block CV                        | 0.915           | 0.891              | 0.939              | 0.599           | 0.625               |
| Random subsets CV                          | 0.947           | 0.933              | 0.961              | 0.603           | 0.629               |
| oPLS-DA calibration with label permutation | 0.658           | 0.816              | 0.500              | 0.696           | 0.673               |
| Leave-one-out CV with label permutation    | 0.521           | 0.694              | 0.348              | 0.781           | 0.751               |

**Table S4. Detailed Tandem MS characteristics of the panel for 16 metabolites that distinguish cancer and control samples with optimal accuracy.** The fragment ions and the corresponding collision energy (CE) are listed in the table. The selected precursor ions are underlined. Asterisks indicate doubly charged species. The fragments were matched to standards, literature spectra, or were consistent with potential molecular structure. The ions in bold are those matched to standard spectra or literature spectra. Each metabolite was identified according to the following four ID levels: 1) elemental formula, retention time, and MS/MS spectrum of standard matched to feature; 2) MS/MS spectrum consistent with literature spectra and fragmentation ions observed consistent with proposed structure; 3) putative compound class based on chromatographic elution window; and 4) unknown compounds.

| Feature ID | CE (eV) | m/z of Fragment Ions Observed in MS/MS Experiments                                                                                                                                                                                                                | ID Level | Match Details (Source)                                        |
|------------|---------|-------------------------------------------------------------------------------------------------------------------------------------------------------------------------------------------------------------------------------------------------------------------|----------|---------------------------------------------------------------|
| 279        | 20      | 827.3548, 809.3323, 747.3443, <u>552.2395*</u> , 543.2249*, 534.2239*, 413.1849*, 273.0027, 259.0977, 241.0892, 184.0645, 167.0386, 127.0412, 113.0359                                                                                                            | 4        | ---                                                           |
| 571        | 20      | <b><u>329.1796</u></b> , <b><u>311.1724</u></b> , <b><u>301.1815</u></b> , 176.9747, <b><u>149.0667</u></b> , <b><u>137.0574</u></b> , 122.0354, <b><u>109.0600</u></b>                                                                                           | 2        | consistent with spectrum (Metlin)                             |
| 286        | 30      | <b><u>597.3027</u></b> , <b><u>417.2384</u></b> , <b><u>315.0561</u></b> , <b><u>281.2487</u></b> , <b><u>241.0145</u></b> , <b><u>152.9943</u></b> , <b><u>78.9543</u></b>                                                                                       | 1        | consistent with spectrum from standard, $\Delta R_t=0.14$ min |
| 683        | 20      | <u>261.0698</u> , 217.0877, 182.0152, 173.9687, 162.0230, 145.0616, 122.0789                                                                                                                                                                                      | 2        | fragmentation consistent with structure                       |
| 226        | 30      | <b><u>539.4307</u></b> , <b><u>521.4172</u></b> , 503.3958, <b><u>495.4426</u></b> , <b><u>477.4211</u></b> , <b><u>315.2501</u></b> , <b><u>313.2350</u></b> , <b><u>297.2489</u></b> , <b><u>279.2286</u></b> , <b><u>259.1963</u></b> , <b><u>223.1738</u></b> | 2        | consistent with spectrum (patent application US20100086960)   |
| 45         | 30      | <b><u>536.5101</u></b> , <b><u>506.5003</u></b> , <b><u>504.4754</u></b> , <b><u>488.4896</u></b> , 308.3023, <b><u>296.2623</u></b> , <b><u>280.2670</u></b> , <b><u>263.2381</u></b> , <b><u>254.2506</u></b> , <b><u>237.2218</u></b>                          | 1        | consistent with spectrum from standard, $\Delta R_t=0.12$ min |
| 64         | 40      | <u>365.3416</u> , 311.1647, 283.2539, 253.0947, 239.0772, 225.0588, 211.0508, 183.0102, 96.9600                                                                                                                                                                   | 4        | ---                                                           |
| 28         | 30      | <b><u>524.2764</u></b> , <b><u>327.2311</u></b> , <b><u>283.2466</u></b> , 249.1870, 229.1901, <b><u>214.0530</u></b> , <b><u>196.0394</u></b> , 177.1667,                                                                                                        | 2        | consistent with predicted                                     |

| Feature ID | CE (eV) | m/z of Fragment Ions Observed in MS/MS Experiments                                                                                                                                    | ID Level | Match Details (Source)                          |
|------------|---------|---------------------------------------------------------------------------------------------------------------------------------------------------------------------------------------|----------|-------------------------------------------------|
|            |         | <b>140.0111, 78.9582</b>                                                                                                                                                              |          | spectrum (Lipid Maps)                           |
| 105        | 20      | <u>195.1039</u> , 151.1074, 135.0837, 123.0761                                                                                                                                        | 2        | fragmentation consistent with structure         |
| 14         | 30      | <u>307.2668</u> , 289.2530, 255.2345, 183.0102                                                                                                                                        | 2        | fragmentation consistent with structure         |
| 79         | 20      | <u>245.1385</u> , 187.0961, 169.0847, 125.0972, 123.0809, 97.0633                                                                                                                     | 2        | similar to azelaic acid spectrum (MassBank)     |
| 80         | 40      | <b>883.5355, 601.2842</b> , 599.3239, 581.3085, <b>439.2220</b> , 419.2592, <b>303.2337</b> , 283.2613, <b>241.0078, 223.0040, 152.9943, 78.9582</b>                                  | 2        | consistent with predicted spectrum (Lipid Maps) |
| 123        | 30      | <b>467.3770, 449.3589, 423.3873, 405.3660, 297.2414, 279.2286, 263.2381, 251.1994, 223.1607, 215.1610, 187.1320, 169.1188, 141.1308</b>                                               | 2        | consistent with spectrum (patent US20120136057) |
| 231        | 40      | <u>429.3003</u> , 411.2852, 305.2087, 277.2086, 123.0809                                                                                                                              | 4        | ---                                             |
| 261        | 20      | 729.3936, 685.3970, 590.2924, 572.2783, 554.2859, 512.2432, <u>451.2338*</u> , 430.2339*, 400.8628, 374.8882, 330.1878, 312.1372*, 286.1901, 276.6193*, 255.6189*, 173.0992, 131.0891 | 4        | ---                                             |
| 620        | 20      | <u>129.0945</u> , 115.9221, 100.9348, 99.9227                                                                                                                                         | 4        | ---                                             |
